# Supplementary material for: Increasing efficiency of preclinical research by group sequential designs
Source: PubMed Central journal article supplement (PMC5345756; doi:10.1371/journal.pbio.2001307), 2017-03-10
Supplement: pbio.2001307.s001.pdf [file pbio.2001307.s001.pdf]

**S3 Figure: Predictive capabilities of sequential design (Pocock boundaries).**

|                                                                                                                                                                                  | Optimistic effect size distribution<br>(different approaches) | Pessimistic effect size distribution<br>(different approaches) |
|----------------------------------------------------------------------------------------------------------------------------------------------------------------------------------|---------------------------------------------------------------|----------------------------------------------------------------|
|                                                                                                                                                                                  |                                                               |                                                                |
| Max. samples size per group<br>(interim batch sizes)                                                                                                                             | Freq.<br>seq. Pocock                                          | Freq.<br>seq. Pocock                                           |
| <b>Probability of getting a significant study result <math>P(\text{significant})</math> (%)</b>                                                                                  |                                                               |                                                                |
| 18 (6 + 6 + 6)                                                                                                                                                                   | 19.3                                                          | 9.4                                                            |
| 36 (18 + 18)                                                                                                                                                                     | 28.0                                                          | 12.2                                                           |
| <b>Positive Predictive value of a significant result <math>P(d \neq 0   \text{significant})</math> (%) (PPV)</b>                                                                 |                                                               |                                                                |
| 18 (6 + 6 + 6)                                                                                                                                                                   | 86.5                                                          | 55.9                                                           |
| 36 (18 + 18)                                                                                                                                                                     | 90.9                                                          | 66.7                                                           |
| <b>Positive Predictive value of a significant result <math>P(d \geq 0.5   \text{significant})</math> (%) (PPV)</b>                                                               |                                                               |                                                                |
| 18 (6 + 6 + 6)                                                                                                                                                                   | 78.7                                                          | 47.2                                                           |
| 36 (18 + 18)                                                                                                                                                                     | 83.3                                                          | 57.1                                                           |
| <b>Probability of getting a significant study result that reflects a true effect of <math>d \neq 0</math><br/>(<math>P_{\text{detect true effect } d \neq 0}</math>) (%)</b>     |                                                               |                                                                |
| 18 (6 + 6 + 6)                                                                                                                                                                   | 16.7                                                          | 5.3                                                            |
| 36 (18 + 18)                                                                                                                                                                     | 25.4                                                          | 8.2                                                            |
| <b>Probability of getting a significant study result that reflects a true effect of <math>d \geq 0.5</math><br/>(<math>P_{\text{detect true effect } d \geq 0.5}</math>) (%)</b> |                                                               |                                                                |
| 18 (6 + 6 + 6)                                                                                                                                                                   | 15.2                                                          | 4.5                                                            |
| 36 (18 + 18)                                                                                                                                                                     | 23.3                                                          | 7.0                                                            |

Upper Left: ‘Optimistic’ scenario with more larger effect sizes. Upper right: ‘Pessimistic’ scenario with mostly effect sizes of 0. Bottom: Probability of getting a significant test result reflecting a true effect of  $d \neq 0$  or  $d \geq 0.5$ , respectively. First, the probabilities  $P(\text{significant})$  for getting any significant study results are given, then the corresponding positive predictive values and finally the product of both giving the corresponding overall probability of getting a significant study result that truly represents an effect of  $d \neq 0$  or  $d \geq 0.5$  ( $P_{\text{detect true effect}}$ ). Stopping rules that allowed early stopping for futility or success as given in Table S1.
